# Supplementary material for: Rifaximin Prevents T-Lymphocytes and Macrophages Infiltration in Cerebellum and Restores Motor Incoordination in Rats with Mild Liver Damage
Source: MDPI journal article supplement (doi:10.3390/biomedicines9081002), 2021-08-12

# Gating Strategy

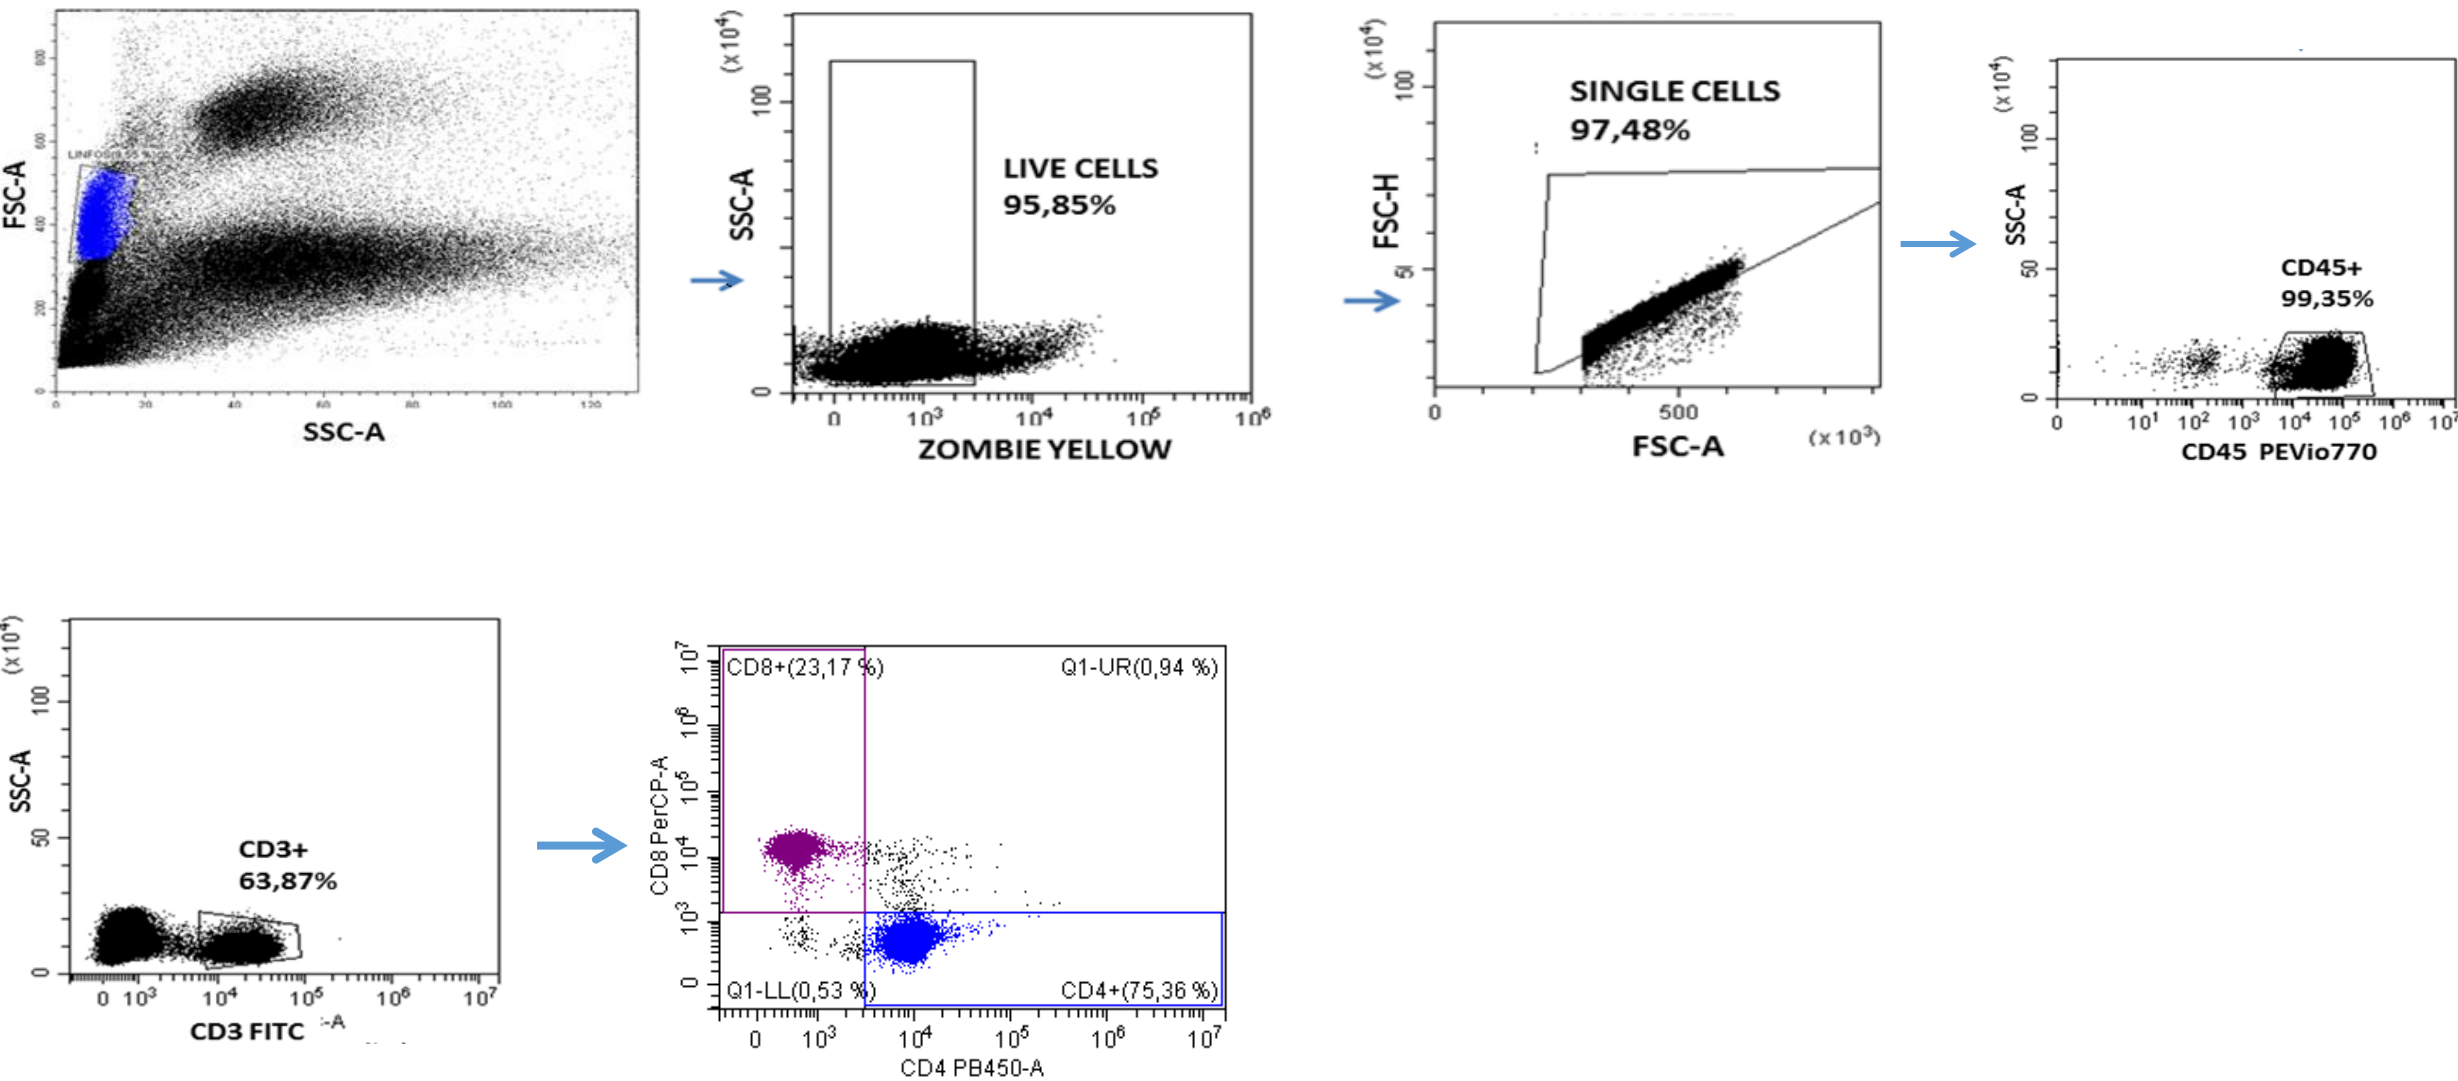

# Gating Strategy

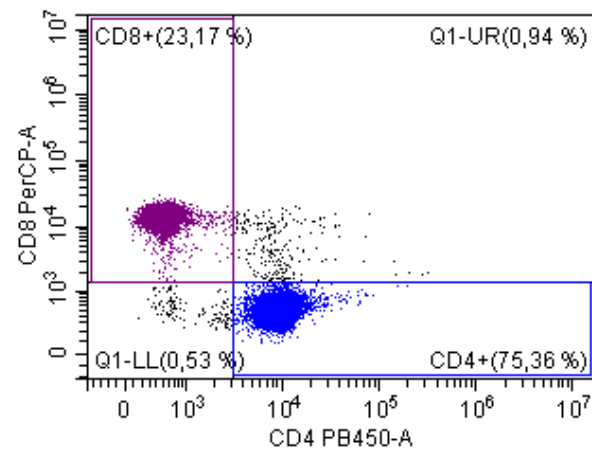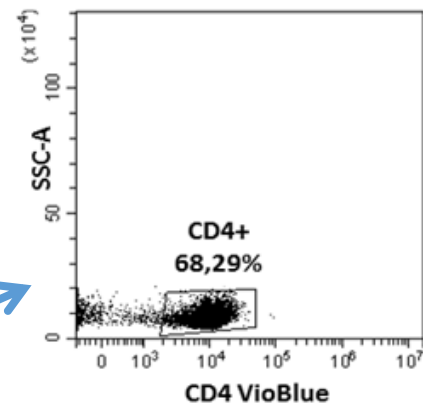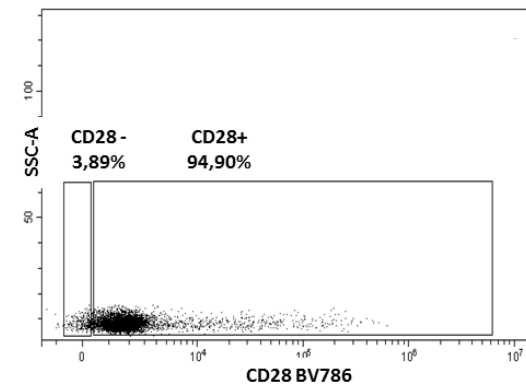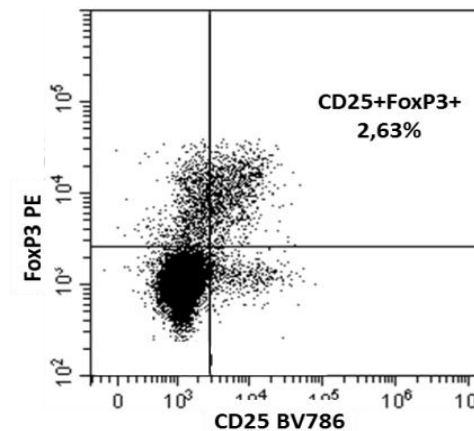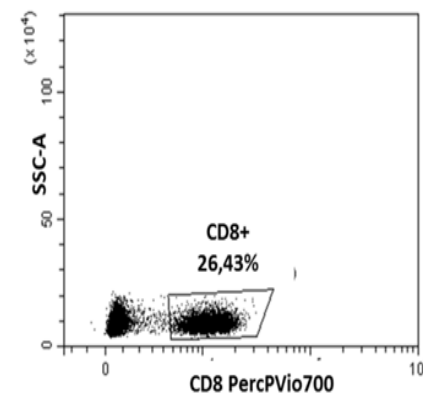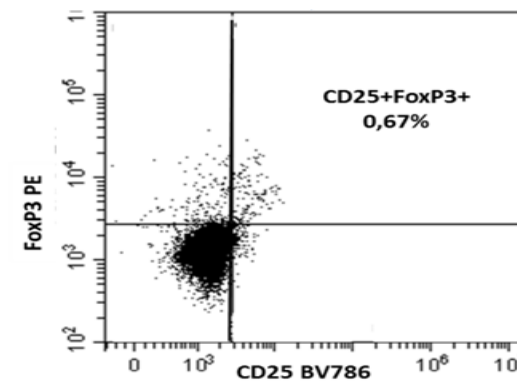

**Figure 3A**

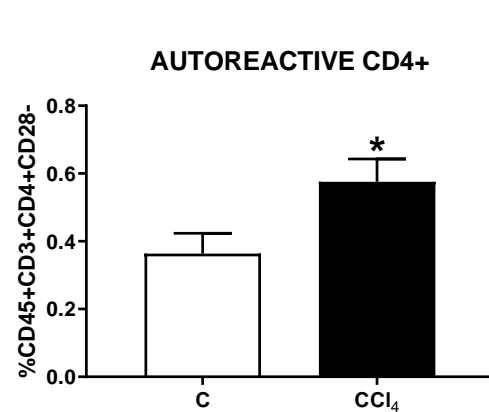

**AUTOREACTIVE CD4+ 2 Weeks**

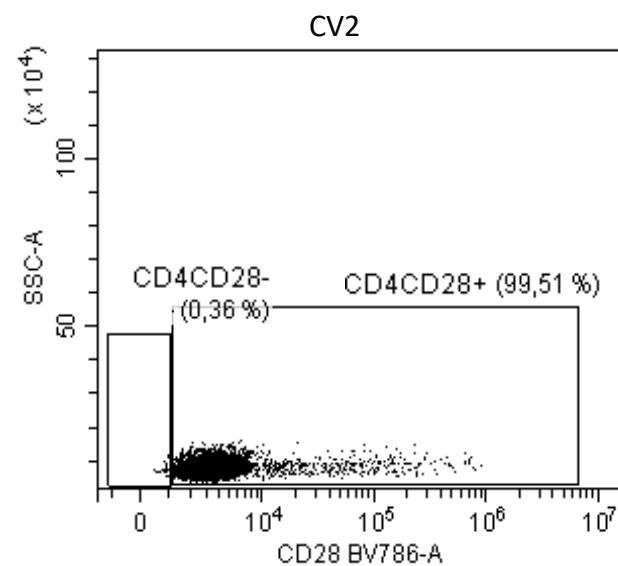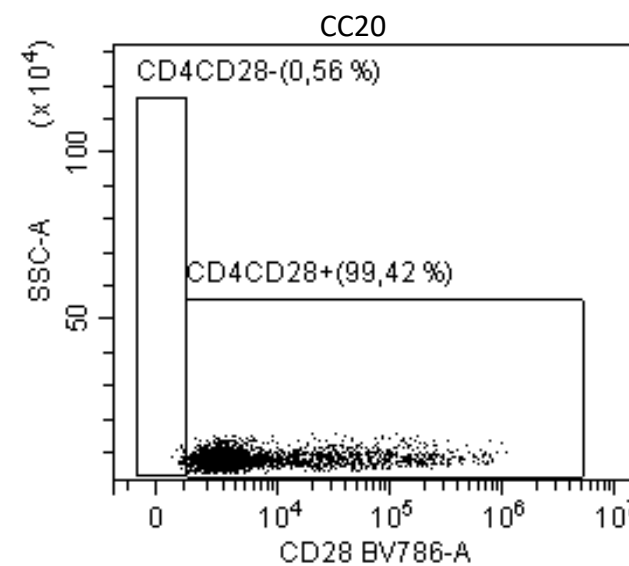

Figure 3D

AUTOREACTIVE CD4+ 4 Weeks

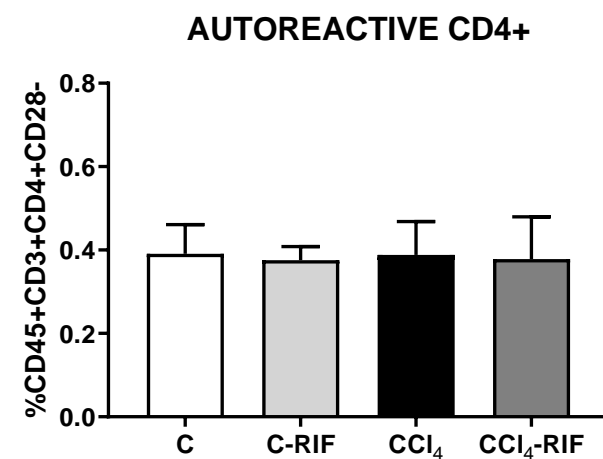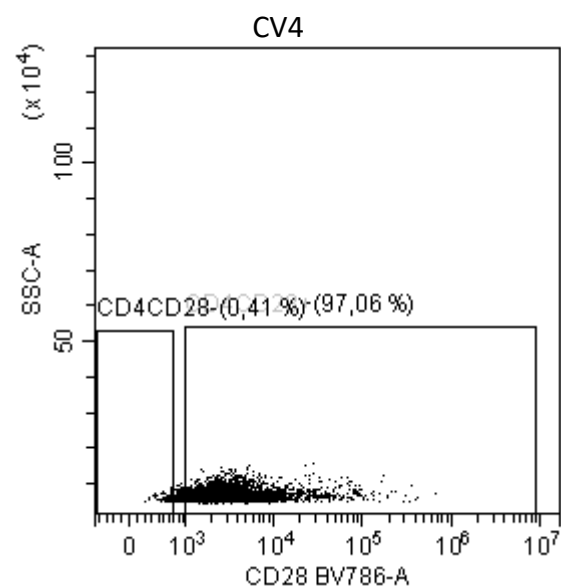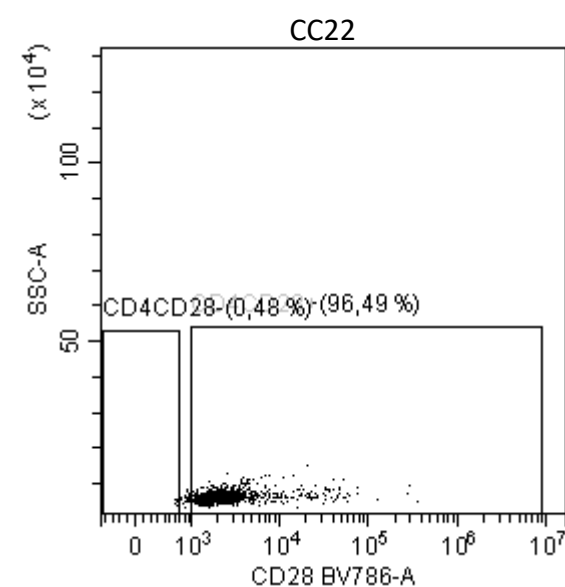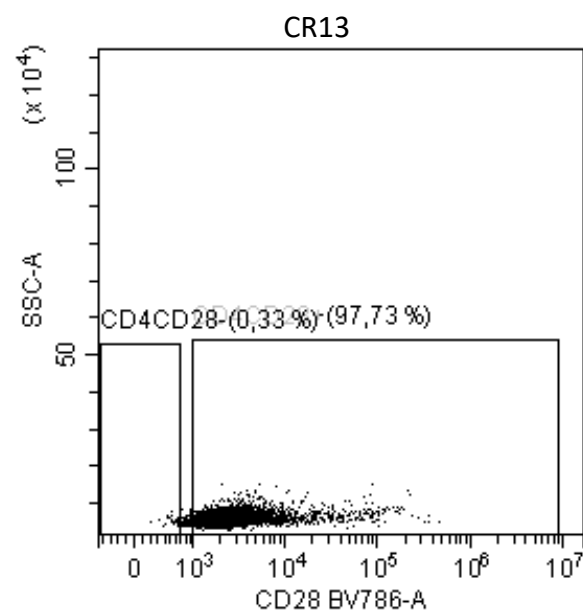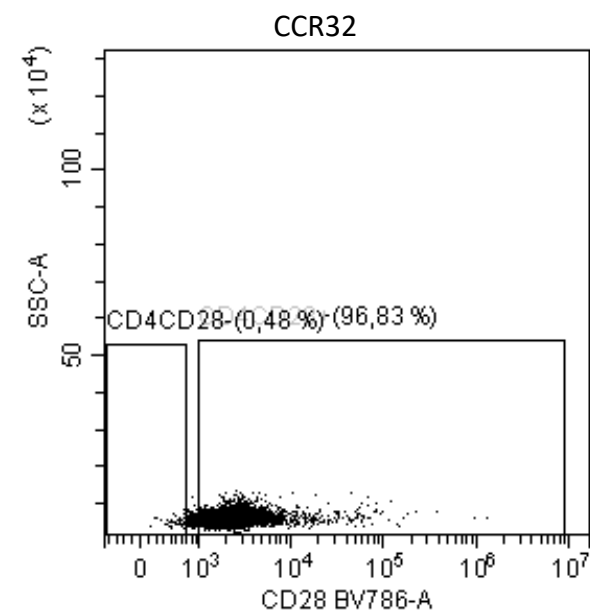

**Figure 3B**

REGULATORY T CELLS CD8 + **2 Weeks**

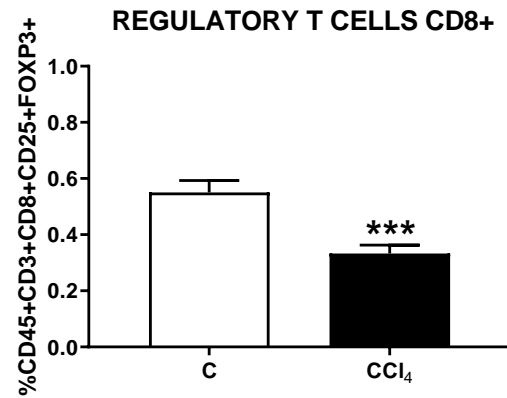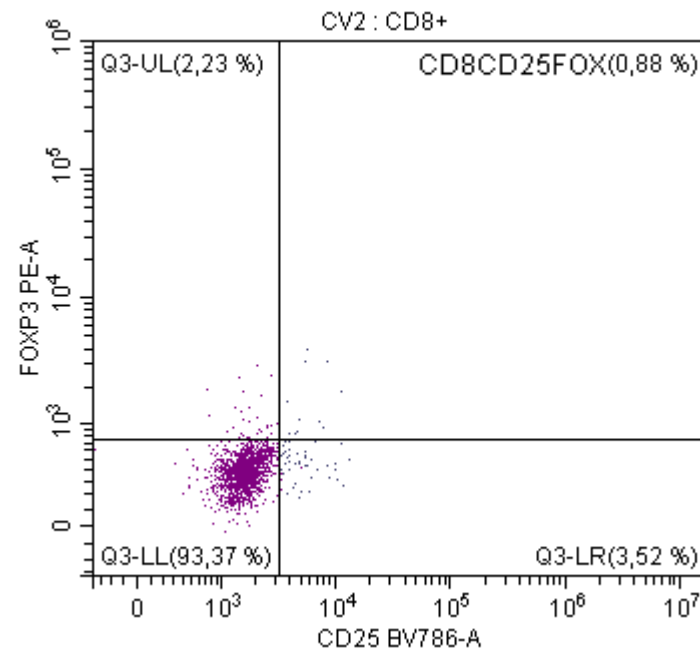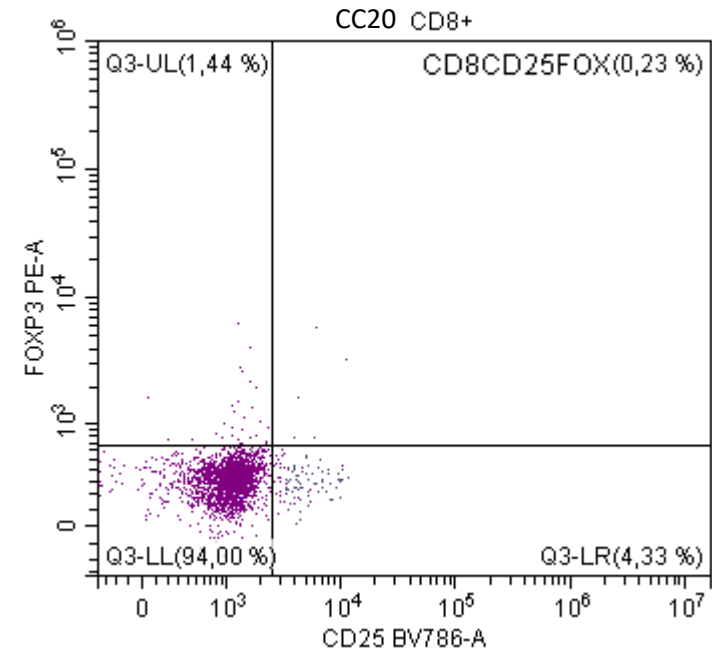

Figure 3C

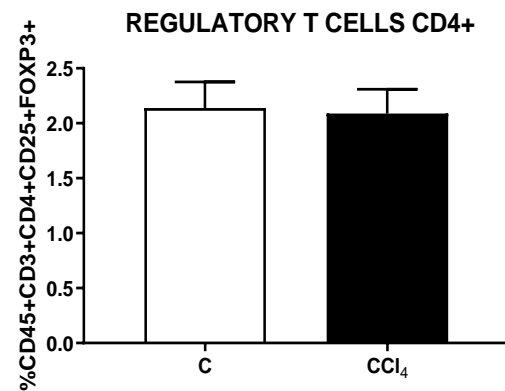

REGULATORY T CELLS CD4 + **2 Weeks**

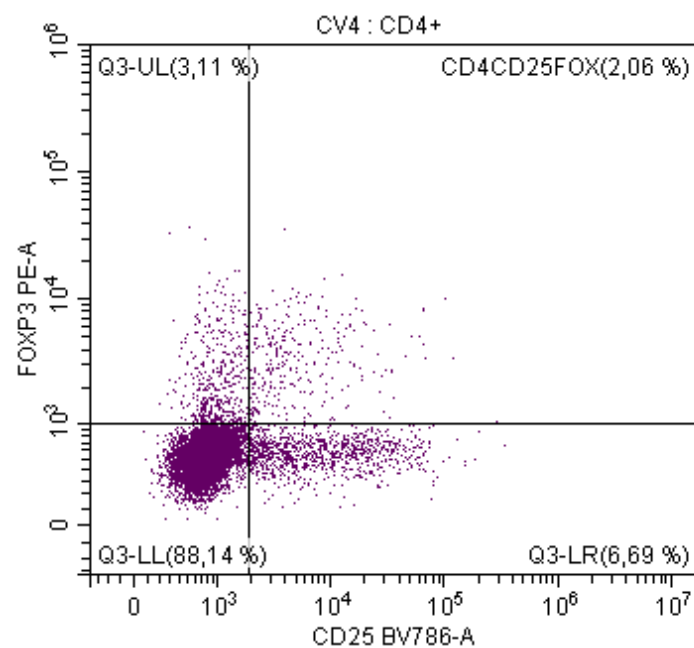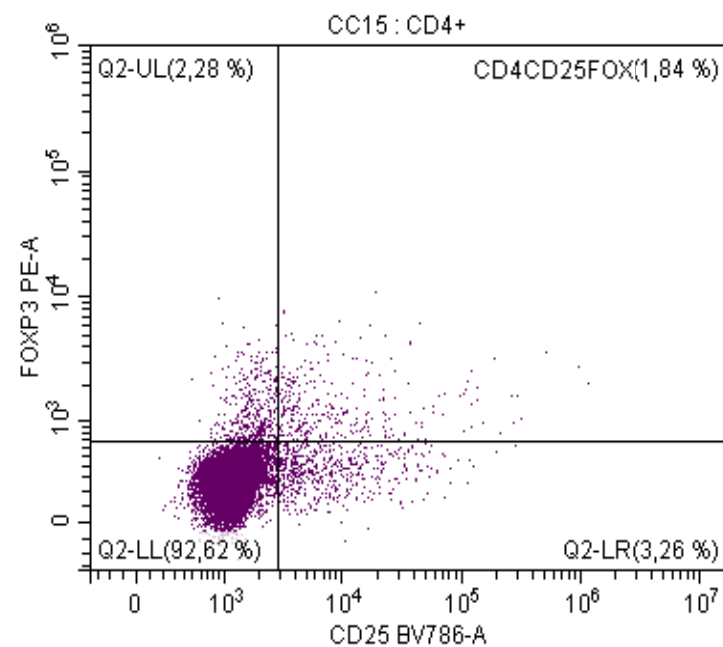

# REGULATORY T CELLS CD8 + 4 Weeks

Figure 3E

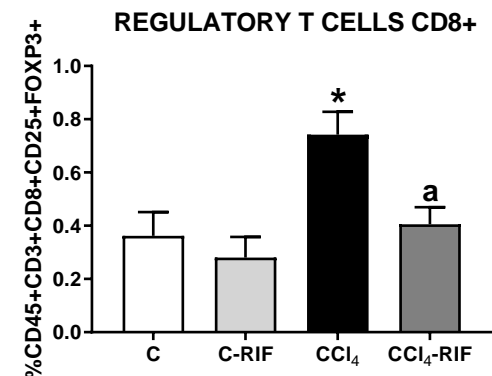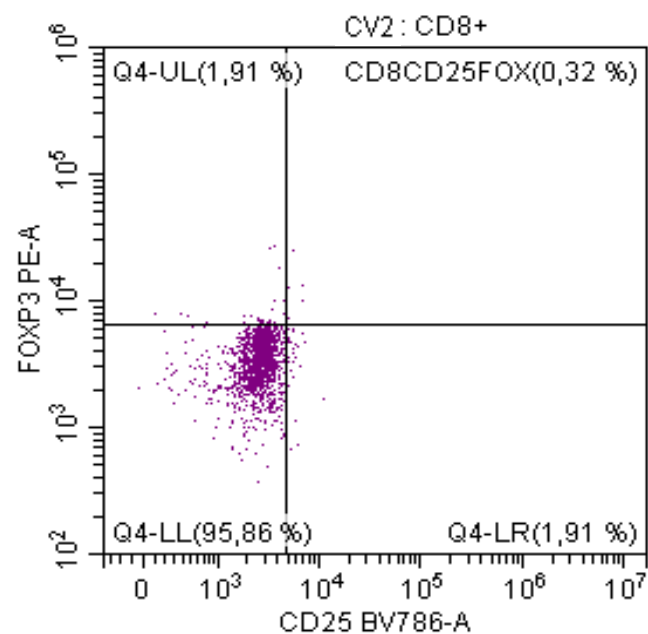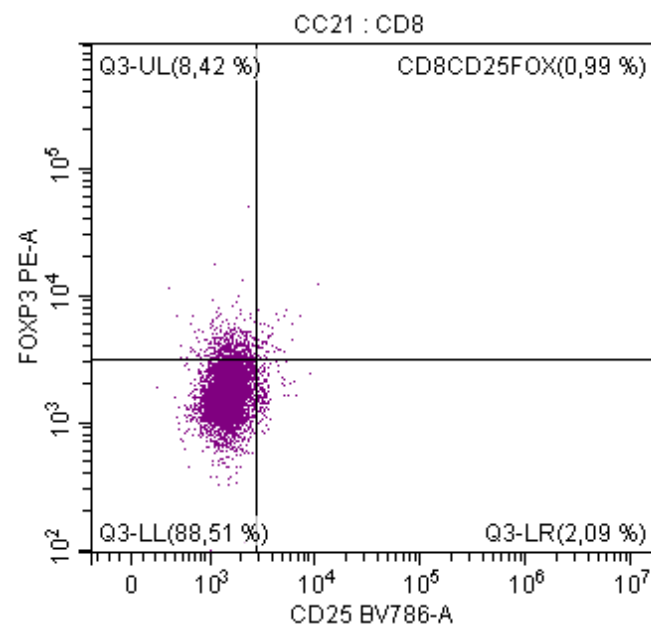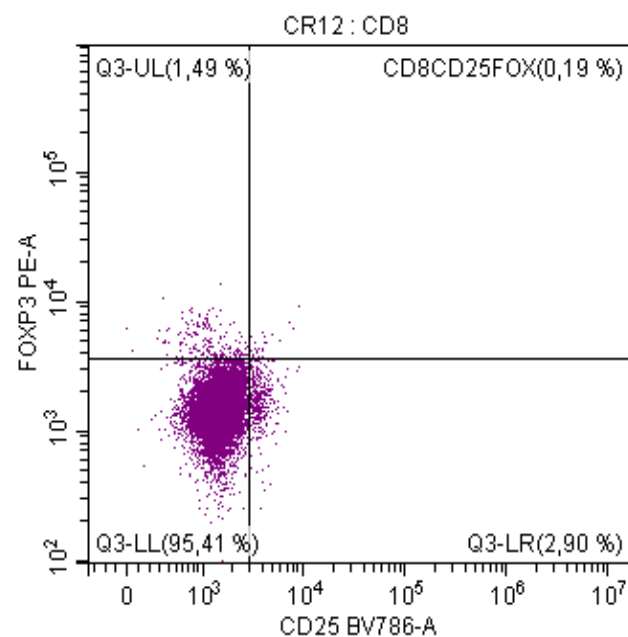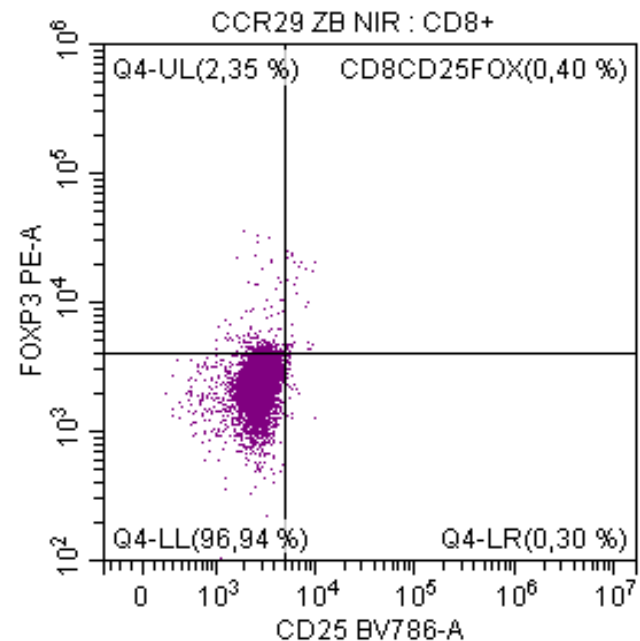

**Figure 3F**

# REGULATORY T CELLS CD4 + 4 Weeks

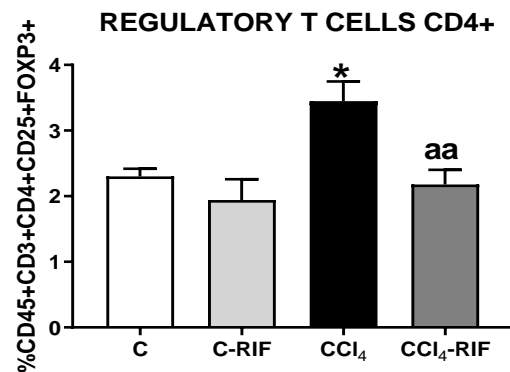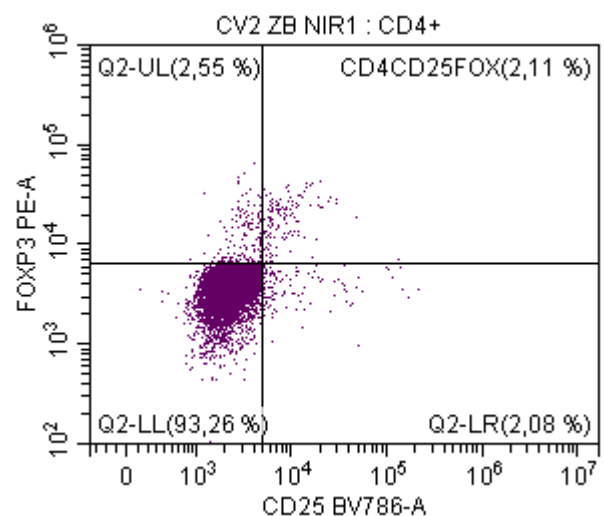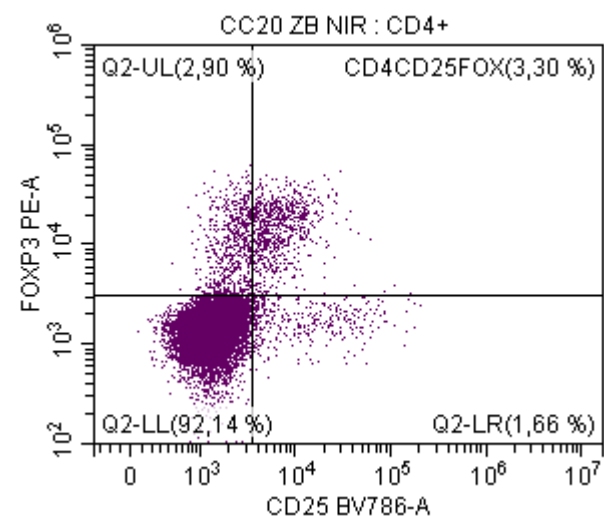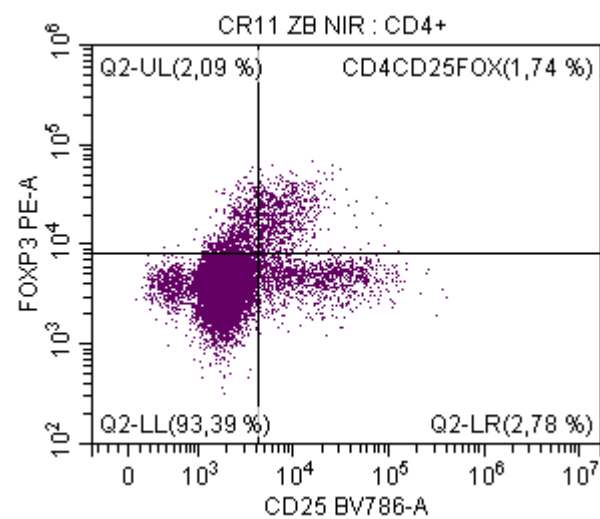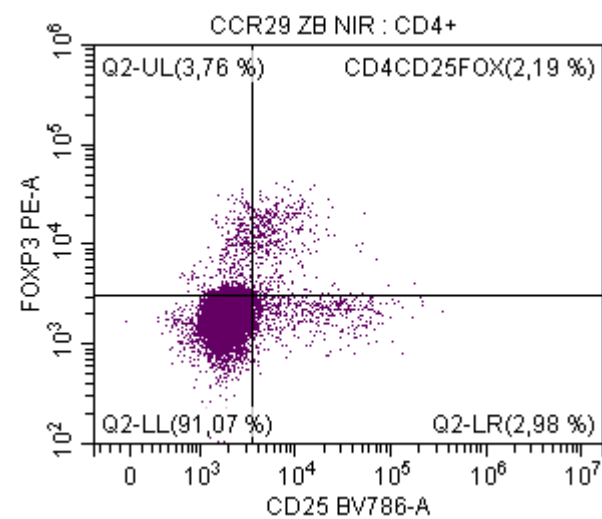

Supplement: s1 [file s1]
