# Supplementary figures and images for: Rifaximin Prevents T-Lymphocytes and Macrophages Infiltration in Cerebellum and Restores Motor Incoordination in Rats with Mild Liver Damage
Source: MDPI journal article supplement (doi:10.3390/biomedicines9081002), 2021-08-12

TNF- $\alpha$

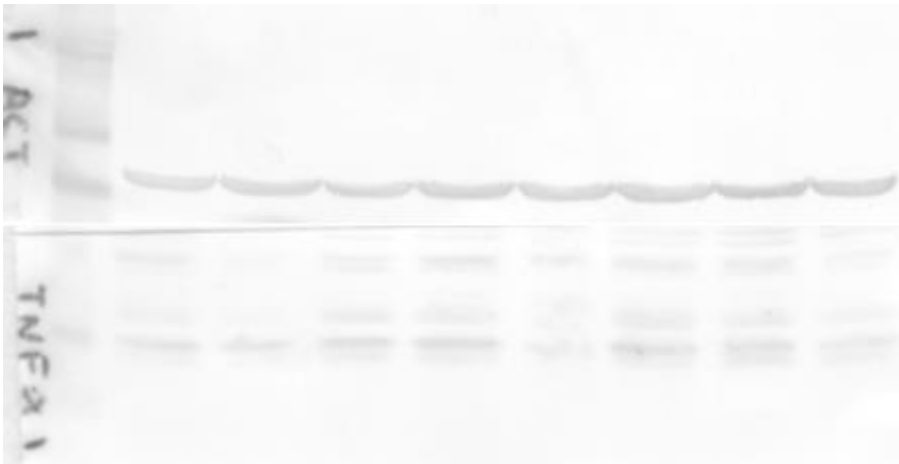

IL-6

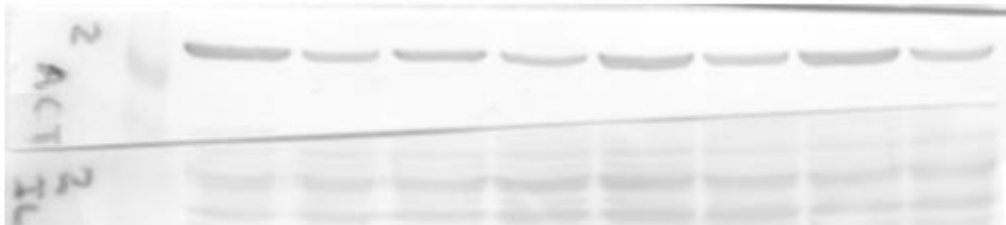

## IL-18

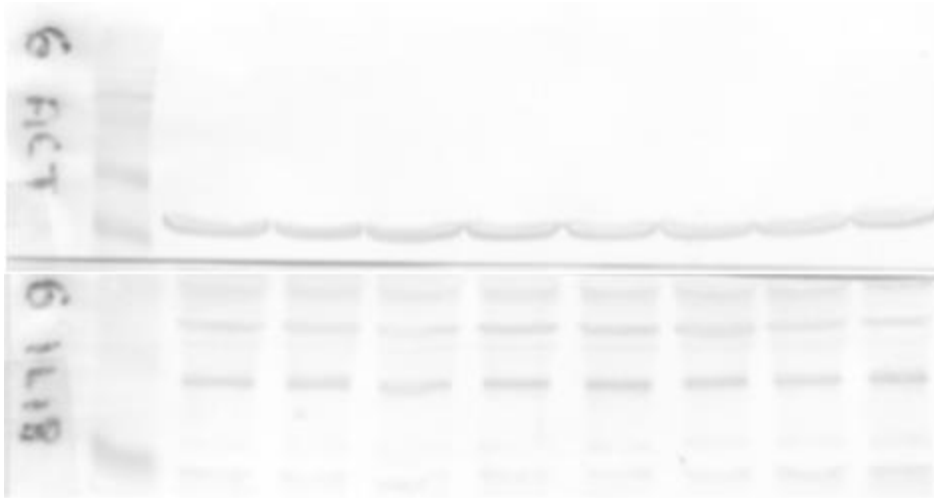

## IL-17

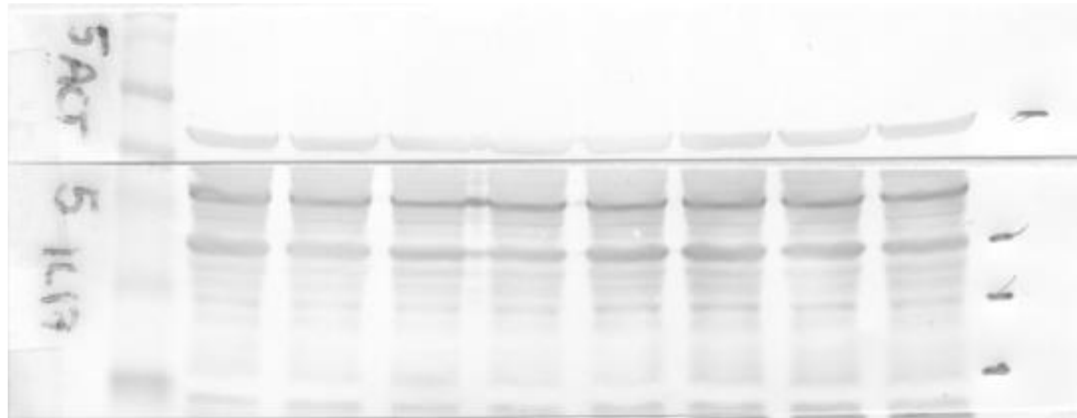

## IL-15

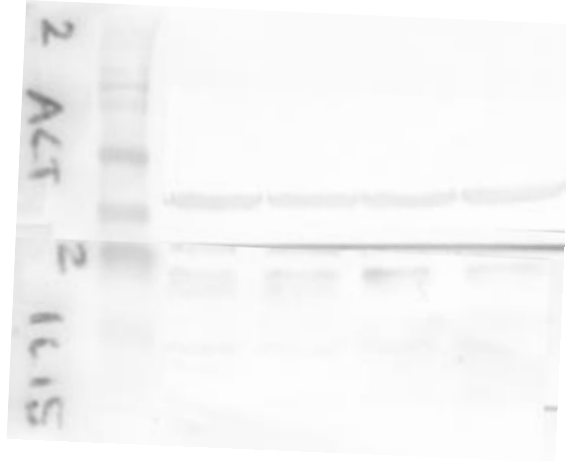

TGF-β

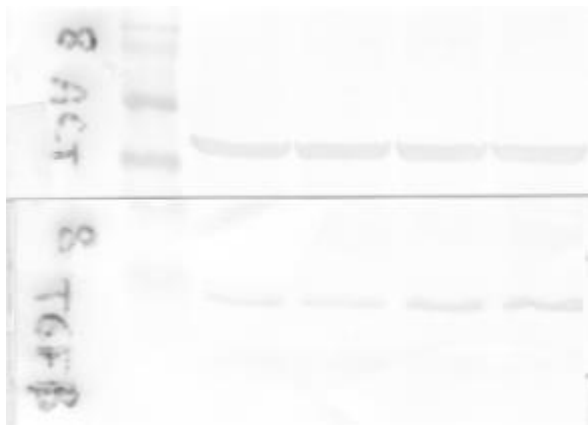

## IL-10

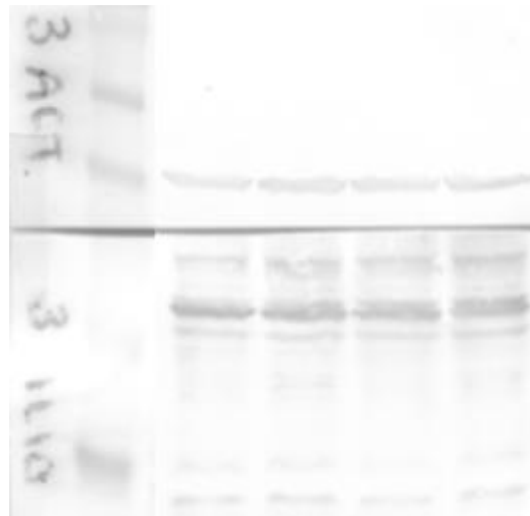

IL-4

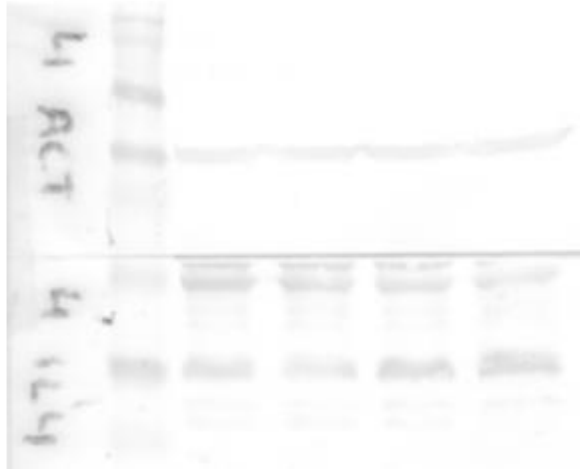

Supplement: s1 [file s1]
